# Supplementary material for: Utility of Gene Panels for the Diagnosis of Inborn Errors of Metabolism in a Metabolic Reference Center
Source: MDPI journal article supplement (doi:10.3390/genes12081262), 2021-08-19
Supplement: s1 [file s1]

**Supplementary Table S1** - Clinical data and genetic findings for each patient for which a positive diagnosis was established using the INT MET panel.

| Cases | Age | Sex | HPO                                                                                                                         | Gene  | Variants                                                          | Phenomizer | Disorder MIM                                                | Changes in medication and/or diet* | Parents/Inheritance                  |
|-------|-----|-----|-----------------------------------------------------------------------------------------------------------------------------|-------|-------------------------------------------------------------------|------------|-------------------------------------------------------------|------------------------------------|--------------------------------------|
| 1     | 2 m | M   | Focal myoclonic seizures<br>EEG with burst suppression<br>Lethargy<br>Nonketotic hyperglycinemia<br>Intellectual disability | AMT   | c.2T>C/<br>c.878-1G>A                                             | p=0.0040   | Glycine encephalopathy<br>#605899                           | Yes                                | Carriers<br>Autosomal recessive      |
| 2     | 9 y | M   | Cerebral palsy<br>Epileptic encephalopathy<br>Epileptic spasms                                                              | PCCA  | c.469-4A>G/<br>c.929C>G                                           | p=0.4157   | Propionic acidemia<br>#606054                               | Yes                                | Carriers<br>Autosomal recessive      |
| 3     | -   | M   | Focal myoclonic seizures<br>EEG with burst suppression<br>Lethargy<br>Nonketotic hyperglycinemia                            | GLDC  | c.2714T>G                                                         | p=0.0221   | Glycine encephalopathy<br>#605899                           | Yes                                | <i>De novo</i><br>Autosomal dominant |
| 4     | 3 m | F   | Seizures<br>Xanthine nephrolithiasis<br>Encephalopathy<br>Microcephalia<br>Hypouricemia<br>Growth delay                     | MOCS2 | c.244A>T/<br>c.244A>T                                             | p=0.0481   | Molybdenum cofactor<br>deficiency B<br>#252160              | Yes                                | Carriers<br>Autosomal recessive      |
| 5     | 7 m | F   | Anemia<br>Leukopenia<br>Thrombocytopenia<br>Gingivitis<br>Abnormality of homocysteine<br>metabolism<br>Sepsis               | TCN2  | g.(?_31018929)_(31019095_?)del/<br>g.(?_31018929)_(31019095_?)del | p=0.0326   | Transcobalamin II<br>deficiency<br>#275350                  | Yes                                | Carriers<br>Autosomal recessive      |
| 6     | 1 y | F   | Hyperphenylalaninemia<br>Abnormality tyrosine<br>metabolism                                                                 | PAH   | c.842C>T/<br>c.490A>G                                             | p=0.0018   | Hyperphenylalaninemia<br>#261600                            | No                                 | Carriers<br>Autosomal recessive      |
| 7     | 3 y | M   | Hyperphenylalaninemia<br>Abnormality tyrosine<br>metabolism                                                                 | PAH   | c.782G>A/<br>c.136G>A                                             | p=0.0018   | Hyperphenylalaninemia<br>#261600                            | No                                 | Carriers<br>Autosomal recessive      |
| 8     | 7 m | M   | Hypocalcemia<br>Vitamin D deficiency<br>Organic aciduria                                                                    | MCCC2 | c.1015G>A/<br>c.1423G>A                                           | p=0.0458   | 3-Methylcrotonyl-CoA<br>carboxylase 2 deficiency<br>#210210 | Yes                                | Carriers<br>Autosomal recessive      |

|                               |         |   |                                                                 |              |                               |          |                                                                                 |     |                                                                                  |
|-------------------------------|---------|---|-----------------------------------------------------------------|--------------|-------------------------------|----------|---------------------------------------------------------------------------------|-----|----------------------------------------------------------------------------------|
| Elevated plasma acylcarnitine |         |   |                                                                 |              |                               |          |                                                                                 |     |                                                                                  |
| Muscular hypotonia            |         |   |                                                                 |              |                               |          |                                                                                 |     |                                                                                  |
| 9                             | 9 y     | M | Hematuria<br>Hypercalciuria<br>Nephrolithiasis<br>Hyperuricemia | <i>HPRT1</i> | c.424A>G                      | p=0.0018 | HRPT-related<br>hyperuricemia<br>#300323                                        | Yes | -<br>X-linked recessive                                                          |
| 10                            | 1 m     | M | Abnormality of fatty-acid<br>metabolism<br>Glutaric acidemia    | <i>ETFDH</i> | c.1601C>T/<br>c.1601C>T       | p=0.0481 | Glutaric acidemia IIC<br>#231680                                                | Yes | Carriers<br>Autosomal recessive                                                  |
| 11                            | 1 y     | M | Hyperuricemia<br>Episodic ataxia<br>Xanthinuria                 | <i>MOCOS</i> | c.2356del/<br>c.512C>T        | p=0.6593 | Xanthinuria, type II<br>#603592                                                 | Yes | Carriers<br>Autosomal recessive                                                  |
| 12                            | 1 m     | M | Hyperphenylalaninemia<br>Abnormality tyrosine<br>metabolism     | <i>PAH</i>   | c.782G>A/<br>c.1066-11G>A     | p=0.0018 | Hyperphenylalaninemia<br>#261600                                                | No  | Carriers<br>Autosomal recessive                                                  |
| 13                            | 23<br>d | M | Hyperphenylalaninemia<br>Abnormality tyrosine<br>metabolism     | <i>PAH</i>   | c.1162G>A/<br>c.728G>A        | p=0.0018 | Hyperphenylalaninemia<br>#261600                                                | No  | Carriers<br>Autosomal recessive                                                  |
| 14                            | 3 y     | F | Hyperphenylalaninemia                                           | <i>PAH</i>   | c.898G>T/<br>c.1066-11G>A     | p=0.3342 | Hyperphenylalaninemia<br>#261600                                                | No  | Carriers<br>Autosomal recessive                                                  |
| 15                            | 13<br>d | F | Hyperphenylalaninemia<br>Abnormality tyrosine<br>metabolism     | <i>PAH</i>   | c.1169A>G/<br>c.116_118delTCT | p=0.0018 | Hyperphenylalaninemia<br>#261600                                                | No  | Carriers<br>Autosomal recessive                                                  |
| 16                            | 6 y     | M | Hyperphenylalaninemia<br>Abnormality tyrosine<br>metabolism     | <i>PAH</i>   | c.261C>A/<br>c.1315+1G>A      | p=0.0018 | Hyperphenylalaninemia<br>#261600                                                | No  | Carriers<br>Autosomal recessive                                                  |
| 17                            | 15 y    | M | Myoclonus<br>Action tremor                                      | <i>ATP7A</i> | c.2068G>C                     | p=0.2510 | Menkes disease<br>#309400                                                       | Yes | NA<br>X-linked recessive                                                         |
| 18                            | 2 m     | M | Methylmalonic acidemia                                          | <i>ACSF3</i> | c.1672C>T/<br>c.1075G>A       | p=0.2151 | Combined malonic and<br>methylmalonic aciduria<br>#614265                       | Yes | Carriers<br>NA                                                                   |
| 19                            | 14 y    | M | Encephalopathy<br>Hyperammonemia<br>Hyperbilirubinemia          | <i>OTC</i>   | c.903A>C                      | p=0.5477 | Hyperammonemia due<br>to ornithine<br>transcarbamylase<br>deficiency<br>#311250 | Yes | Mother carrier,<br>brother and maternal uncle<br>affected<br>Autosomal recessive |
| 20                            | 18 y    | M | Hepatic steatosis                                               | <i>AMACR</i> | c.43delG/<br>c.43delG         | p=0.7096 | Congenital bile acid<br>synthesis defect type 4<br>#214950                      | Yes | Carriers<br>Autosomal recessive                                                  |

|    |     |   |                                                                         |      |                           |          |                                                                |     |                                 |
|----|-----|---|-------------------------------------------------------------------------|------|---------------------------|----------|----------------------------------------------------------------|-----|---------------------------------|
| 21 | 8 y | F | Hepatic steatosis<br>Hepatomegaly<br>Increased hepatic glycogen content | PHKB | c.2581A>G/<br>c.1459-9G>T | p=0.0036 | Phosphorylase kinase deficiency of liver and muscle<br>#261750 | Yes | Carriers<br>Autosomal recessive |
|----|-----|---|-------------------------------------------------------------------------|------|---------------------------|----------|----------------------------------------------------------------|-----|---------------------------------|

\* Changes in medication and/or diet after genetic diagnosis. d:days; F: female; m: month; M: male; NA: not available; y:years

**Supplementary Table S2** - Clinical data and genetic findings for each patient for which a positive diagnosis was established using the HYPO/HYPER panel.

| Cases | Age  | Sex | HPO                                                                                                     | Gene    | Variants                                         | Phenomizer | Disorder MIM                                               | Changes in Medication or Diet* | Parents/Inheritance             |
|-------|------|-----|---------------------------------------------------------------------------------------------------------|---------|--------------------------------------------------|------------|------------------------------------------------------------|--------------------------------|---------------------------------|
| 22    | 1 y  | F   | Hypoketotic hypoglycemia<br>Abnormality of carnitine metabolism                                         | SLC22A5 | c.34G>A/<br>c.1463G>A                            | p=0.0534   | Carnitine deficiency, systemic primary<br>#212140          | Yes                            | Carriers<br>Autosomal recessive |
| 23    | -    | M   | Hepatomegaly<br>Hypoglycemia<br>Motor delay<br>Growth delay                                             | PHKA2   | c.1245+1G>T                                      | p=0.0160   | Glycogen storage disease, type IXa<br>#306000              | Yes                            | Mother<br>X-linked              |
| 24    | -    | M   | Hypoglycemia<br>Vertigo<br>Polyphagia<br>MODY<br>Increased HbA1c levels                                 | CEL     | c.1810G>C/<br>c.1975G>C                          | p=0.0224   | Maturity-onset diabetes of the young, type VIII<br>#609812 | Yes                            | Carriers<br>Autosomal dominant  |
| 25    | 1 y  | M   | Ketotic hypoglycemia<br>Hepatomegaly<br>Increased hepatic transaminases<br>Myopathy                     | AGL     | c.100delC/<br>c.100delC                          | p=0.0718   | Glycogen storage disease III<br>#232400                    | Yes                            | Carriers<br>Autosomal recessive |
| 26    | 6 y  | M   | Hepatomegaly<br>Hypoglycemia<br>Hypercholesterolemia<br>Elevated hepatic transaminases<br>Short stature | PHKA2   | c.3547_3548ins<br>GGTGCCAT<br>GGACACCC<br>TGGAGA | p=0.0174   | Glycogen storage disease, type IXa<br>#306000              | Yes                            | -<br>X-linked                   |
| 27    | 10 y | M   | Hypergalactosemia<br>Galactosuria<br>Hypoglycemia                                                       | GALT    | c.443G>A/<br>c.443G>A                            | p=0.0006   | Galactosemia<br>#230400                                    | No                             | Carriers<br>Autosomal recessive |

|    |      |   |                                                                                                                                                                                      |              |                         |          |                                                             |     |                                       |
|----|------|---|--------------------------------------------------------------------------------------------------------------------------------------------------------------------------------------|--------------|-------------------------|----------|-------------------------------------------------------------|-----|---------------------------------------|
| 28 | 1 m  | M | Hypoketotic hypoglycemia<br>Hyperammonemia<br>Lethargy                                                                                                                               | <i>CPS1</i>  | c.1201G>C/<br>c.2810T>A | p=0.0320 | Carbamoyl phosphate<br>synthetase I deficiency<br>#237300   | Yes | Carriers<br>Autosomal recessive       |
| 29 | -    | M | Intrahepatic cholestasis<br>Elevated alkaline phosphatase<br>Hypercalcemia<br>Hyperphosphatemia<br>Vitamin D deficiency<br>Elevated hepatic transaminases<br>Hypoalbuminoproteinemia | <i>PHKA2</i> | c.3614C>T               | p=0.0003 | Glycogen storage<br>disease, type IXa<br>#306000            | Yes | -<br>X-linked                         |
| 30 | 5 y  | M | Hepatomegaly<br>Hypoglycemia<br>Fasting hypoglycemia                                                                                                                                 | <i>PHKA2</i> | c.2746C>T               | p=0.055  | Glycogen storage<br>disease, type IXa<br>#306000            | Yes | -<br>X-linked                         |
| 31 | 17 y | F | Abdominal pain<br>Macrovesicular hepatic steatosis                                                                                                                                   | <i>ALDOB</i> | c.448G>C/<br>c.448G>C   | p=0.005  | Fructose intolerance,<br>hereditary<br>#229600              | Yes | Carriers<br>Autosomal recessive       |
| 32 | 8 m  | F | Hyperinsulinemia<br>Abdominal distention<br>Fasting hypoglycemia<br>Intrauterine growth retardation                                                                                  | <i>INSR</i>  | c.2621C>T/<br>c.3712C>T | p=0.0028 | Hyperinsulinemic<br>hypoglycemia, familial,<br>5<br>#609968 | Yes | De novo/Mother<br>Autosomal recessive |

\* Changes in medication and/or diet after genetic diagnosis .d:days; F: female; m: month; M: male; y:years

**Supplementary Table S3** - Clinical data and genetic findings for each patient for which a positive diagnosis was established using the MITO panel.

| Cases | Age  | Sex | HPO                                                                                                                                                                          | Gene           | Variants                 | Phenomizer | Disorder<br>MIM                                                                                  | Changes in<br>Medication<br>or Diet* | Parents/Inheritance              |
|-------|------|-----|------------------------------------------------------------------------------------------------------------------------------------------------------------------------------|----------------|--------------------------|------------|--------------------------------------------------------------------------------------------------|--------------------------------------|----------------------------------|
| 33    | 3 y  | F   | Ventriculomegaly<br>Epileptic spasms<br>Hypoplasia of the corpus callosum<br>Severe expressive language delay<br>Slowly progressive spastic<br>quadriparesis                 | <i>GFM1</i>    | c.2011C>T/<br>c.1401delA | p=0.0302   | Combined oxidative<br>phosphorylation<br>deficiency<br>#609060                                   | No                                   | Carriers<br>Autosomal recessive  |
| 34    | 9 y  | M   | Intrauterine growth retardation<br>Delayed CNS myelination<br>Athetosis<br>Lactic acidosis                                                                                   | <i>FOXRED1</i> | c.920G>A/<br>c.733+1G>A  | p=0.1400   | Mitochondrial complex<br>I deficiency<br>#618241                                                 | No                                   | Carriers<br>Autosomal recessive  |
| 35    | 18 y | M   | Decreased activity of mitochondrial<br>complex I and IV<br>Left ventricular hypertrophy<br>Abnormality of coordination<br>Dysdiadochokinesia<br>Specific learning disability | <i>TSFM</i>    | c.719G>C/<br>c.719G>C    | p=0.0032   | Combined oxidative<br>phosphorylation<br>deficiency<br>#610505                                   | No                                   | Carriers<br>Autosomal recessive  |
| 36    | -    | F   | Epileptic encephalopathy<br>Febrile seizures<br>Status epilepticus<br>Disinhibition<br>Global developmental delay                                                            | <i>GFM2</i>    | c.1925A>C/<br>c.1922T>A  | p=0.2282   | Combined oxidative<br>phosphorylation<br>deficiency<br>#618397                                   | No                                   | Carriers<br>Autosomal recessive  |
| 37    | 6 y  | F   | Abnormal mitochondria in muscle<br>tissue<br>Agenesis of corpus callosum<br>Cerebral atrophy<br>Increased CSF lactate<br>Global developmental delay<br>Seizures              | <i>ADCK4</i>   | c.418G>A                 | p=0.9010   | Nephrotic syndrome,<br>type 9<br>#615573                                                         | Yes                                  | De novo<br>Autosomal<br>dominant |
| 38    | 6 y  | F   | Hypomimic face<br>Feeding difficulties<br>Bilateral ptosis<br>Optic atrophy<br>Muscular hypotonia<br>Areflexia                                                               | <i>DNM1L</i>   | c.1337G>T                | p=0.0288   | Encephalopathy, lethal,<br>due to defective<br>mitochondrial<br>peroxisomal fission 1<br>#614388 | No                                   | De novo<br>Autosomal<br>dominant |

|    |      |   |                                                                                                                                                                         |       |                                            |          |                                                                           |     |                                                     |
|----|------|---|-------------------------------------------------------------------------------------------------------------------------------------------------------------------------|-------|--------------------------------------------|----------|---------------------------------------------------------------------------|-----|-----------------------------------------------------|
| 39 | 24 h | M | Hypertrophic cardiomyopathy<br>Muscle weakness<br>Congenital cataract<br>Increased serum lactate                                                                        | AGK   | c.518+1G>A/<br>c.518+1G>A                  | p=0.0160 | Sengers syndrome<br>#212350                                               | No  | Carriers<br>Autosomal recessive                     |
| 40 | -    | M | Decreased activities of mitochondrial<br>complexes I and III<br>Neonatal hypotonia<br>Global development delay<br>Seizures                                              | EARS2 | c.319C>T/<br>c.322C>T                      | p=0.0023 | Combined oxidative<br>phosphorylation<br>deficiency 12<br>#614924         | No  | Carriers<br>Autosomal recessive                     |
| 41 | -    | F | Hypertrophic cardiomyopathy<br>Hypotonia<br>Lactic acidosis                                                                                                             | OPA1  | c.1710T>G                                  | -        | Optic atrophy<br>#165500<br><br>Optic atrophy plus<br>syndrome<br>#125250 | No  | De novo<br>Autosomal<br>dominant                    |
| 42 | 6 y  | M | Muscular hypotonia<br>Myalgia<br>Ataxia<br>Head tremor<br>Limb tremor<br>Ptosis<br>Failure to thrive                                                                    | PDHA1 | c.787C>G                                   | p=0.0366 | Pyruvate<br>dehydrogenase E1-<br>alpha deficiency<br>#312170              | Yes | De novo<br>X-linked dominant                        |
| 43 | 8 m  | F | Lactic acidosis<br>Generalized hypotonia<br>Global developmental delay<br>Growth delay<br>Increased serum lactate<br>Thick eyebrow                                      | FBXL4 | c.858+5G>C/<br>c.1510T>C                   | p=0.0032 | Mitochondrial DNA<br>depletion syndrome 13<br>#615471                     | No  | Carriers/Affected<br>brother<br>Autosomal recessive |
| 44 | 5 y  | M | Increased serum lactate<br>Infantile axial hypotonia<br>Ataxia<br>Severe expressive language delay<br>Short corpus callosum<br>Hypotonia<br>Seizures<br>Lactic acidosis | FARS2 | c.1256G>A/<br>g.(?_5404749)_(5404959_?)del | p=0.0012 | Combined oxidative<br>phosphorylation<br>deficiency 14<br>#614946         | No  | Carriers<br>Autosomal recessive                     |
| 45 | 4 m  | M | Increased serum lactate<br>Sudden cardiac death,<br>Encephalopathy                                                                                                      | ACAD9 | c.358delT/<br>c.809-2A>G                   | p=0.0018 | Mitochondrial complex<br>I deficiency, nuclear<br>type 20                 | No  | Carriers<br>Autosomal recessive                     |

|    |      |   |                                                                                                                                                    |                 |                               |          |                                                                 |    |                                                  |
|----|------|---|----------------------------------------------------------------------------------------------------------------------------------------------------|-----------------|-------------------------------|----------|-----------------------------------------------------------------|----|--------------------------------------------------|
|    |      |   | Hypoglycemia<br>Acute liver failure                                                                                                                |                 |                               |          | #611126                                                         |    |                                                  |
| 46 | 12 y | M | Delayed psychomotor development<br>Metabolic acidosis                                                                                              | <i>MTO1</i>     | c.170G>T/                     | p=0.4211 | Combined oxidative phosphorylation deficiency 10<br>#614702     | No | Carriers<br>Autosomal recessive                  |
| 47 | 2 m  | M | Lactic acidosis                                                                                                                                    | <i>GFM1</i>     | c.640A>T/<br>c.1199G>C        | p=0.4194 | Combined oxidative phosphorylation deficiency 1<br>#609060      | No | Carriers<br>Autosomal recessive                  |
| 48 | 1 y  | M | Lactic acidosis<br>Nystagmus<br>Ragged-red muscle fibers<br>Global developmental delay<br>Failure to thrive in infancy                             | <i>COX15</i>    | c.649C>T/<br>c.649C>T         | p=0.0548 | Mitochondrial complex IV deficiency, nuclear type 6<br>#615119  | No | Carriers<br>Autosomal recessive                  |
| 49 | 17 y | F | Leukodystrophy<br>Agenesis of corpus callosum<br>Decreased activity of mitochondrial complex I and III<br>Lactic acidosis<br>Increased CSF lactate | <i>EARS2</i>    | c.670G>A/<br>c.376C>T         | p=0.0013 | Combined oxidative phosphorylation deficiency 12<br>#614924     | No | Carriers<br>Autosomal recessive                  |
| 50 | 12 y | M | Muscle weakness<br>Encephalopathy<br>Lactic acidosis                                                                                               | <i>ACAD9</i>    | c.737T>C/<br>c.860G>A         | p=0.0005 | Mitochondrial complex I deficiency, nuclear type 20<br>#611126  | No | Carriers/Affected brother<br>Autosomal recessive |
| 51 | -    | M | Encephalopathy<br>Generalized hypotonia<br>Lactic academia<br>Ptosis<br>Generalized hypotonia<br>Failure to thrive<br>Global developmental delay   | <i>C12orf65</i> | c.207_220del/<br>c.207_220del | p=0.0599 | Combined oxidative phosphorylation deficiency 7<br>#613559      | No | Carriers<br>Autosomal recessive                  |
| 52 | 17 y | F | Hypotonia<br>Increased serum and CSF lactate                                                                                                       | <i>PNPT1</i>    | c.1177-2A>C/<br>c.1519G>T     | p=0.0599 | Combined oxidative phosphorylation deficiency 13<br>#614932     | No | Carriers<br>Autosomal recessive                  |
| 53 | 1 y  | F | Nystagmus<br>Pigmentary retinopathy<br>Ptosis<br>Dystonia                                                                                          | <i>PET100</i>   | c.1A>G                        | p=0.0055 | Mitochondrial complex IV deficiency, nuclear type 12<br>#619055 | No | Carriers<br>Autosomal recessive                  |

|    |      |   |                                                                                                                       |               |                           |          |                                                                                                                                   |     |                                 |
|----|------|---|-----------------------------------------------------------------------------------------------------------------------|---------------|---------------------------|----------|-----------------------------------------------------------------------------------------------------------------------------------|-----|---------------------------------|
|    |      |   | Global developmental delay<br>Respiratory insufficiency                                                               |               |                           |          |                                                                                                                                   |     |                                 |
| 54 | -    | F | Hyperlacticaemia<br>Metabolic acidosis<br>Encephalopathy                                                              | <i>EARS2</i>  | c.184A>T/<br>c.920T>C     | p=0.0368 | Combined oxidative<br>phosphorylation<br>deficiency 12<br>#614924                                                                 | No  | Carriers<br>Autosomal recessive |
| 55 | 1 m  | M | Neonatal hypotonia<br>Lethargy<br>Focal seizures<br>Diabetes insipidus<br>Cerebellar and cerebral cortical<br>atrophy | <i>COQ4</i>   | c.202G>C/<br>c.718C>T     | p=0.2884 | Coenzyme Q10<br>deficiency, primary, 7<br>#616276                                                                                 | Yes | Carriers<br>Autosomal recessive |
| 56 | 1 m  | F | Premature birth<br>Hyperlacticaemia<br>Intrauterine growth retardation<br>Oligohydramnios<br>Muscle weakness          | <i>TMEM70</i> | c.317-2A>G/<br>c.317-2A>G | p=0.0417 | Mitochondrial complex<br>V (ATP synthase)<br>deficiency, nuclear type<br>2<br>#614052                                             | No  | Carriers<br>Autosomal recessive |
| 57 | 12 y | F | Epileptic encephalopathy<br>Status epilepticus<br>Clonus<br>Generalized hypotonia<br>Progressive spasticity           | <i>ATPAF2</i> | c.133+1G>T/<br>c.133+1G>T | p=0.053  | Mitochondrial complex<br>V (ATP synthase)<br>deficiency, nuclear type<br>1<br>#604273                                             | No  | Carriers<br>Autosomal recessive |
| 58 | 2 m  | M | Hyperlacticaemia<br>Methylmalonic aciduria<br>Mitochondrial DNA depletion<br>Encephalopathy                           | <i>SUCLA2</i> | c.850C>T                  | p=0.0375 | Mitochondrial DNA<br>depletion syndrome 5<br>(encephalomyopathic<br>form with or without<br>methylmalonic<br>aciduria)<br>#612073 | No  | Carriers<br>Autosomal recessive |
| 59 | 8 y  | M | Spastic tetraparesis<br>Progressive encephalopathy<br>Abnormality of the gastrointestinal<br>tract                    | <i>MCCC1</i>  | c.1441C>A/<br>c.1423G>A   | p=0.3542 | 3-Methylcrotonyl-CoA<br>carboxylase 1 deficiency<br>#210200                                                                       | Yes | Carriers<br>Autosomal recessive |
| 60 | 1 m  | M | Metabolic acidosis<br>Myocardial fibrosis<br>Reduced consciousness/confusion<br>Respiratory difficulties              | <i>TK2</i>    | c.230C>T/<br>c.31+470G>A  | p=0.2884 | Mitochondrial DNA<br>depletion syndrome,<br>myopathic form<br>#609560                                                             | No  | Carriers<br>Autosomal recessive |

\* Changes in medication and/or diet after genetic diagnosis ;d:days; F: female; m: month; M: male; y:years



**Supplementary Table S4** - Clinical data and genetic findings for each patient for which a positive diagnosis was established using the COMP MOL panel.

| Cases | Age  | Sex | HPO                                                                                                                                                                                        | Gene          | Variants                 | Phenomizer | Disorder<br>MIM                                                                                                                | Changes in<br>Medication<br>or Diet* | Parents/Inheritance                                        |
|-------|------|-----|--------------------------------------------------------------------------------------------------------------------------------------------------------------------------------------------|---------------|--------------------------|------------|--------------------------------------------------------------------------------------------------------------------------------|--------------------------------------|------------------------------------------------------------|
| 61    | -    | F   | Thrombocytopenia<br>Glaucoma<br>Nystagmus<br>Increased CSF interferon alpha                                                                                                                | <i>TREX1</i>  | c.218C>T/<br>c.404A>C    | p=0.0525   | Aicardi-Goutieres<br>syndrome 1<br>#225750                                                                                     | No                                   | Carriers, affected<br>sister<br><br>Autosomal<br>recessive |
| 62    | 10 y | M   | Specific learning disability<br>Ataxia<br>Cerebellar atrophy<br>EMG: axonal abnormality<br>Attention deficit/hyperactivity<br>Generalized myoclonic seizures<br>Global developmental delay | <i>TPP1</i>   | c.622C>T/<br>c.887-10T>C | p=0.0187   | Ceroid lipofuscinosis,<br>neuronal, 2<br>#204500                                                                               | Yes                                  | Carriers<br><br>Autosomal<br>recessive                     |
| 63    | 5 y  | F   | Developmental regression<br>Epileptic encephalopathy<br>Apathy<br>Generalized hypotonia                                                                                                    | <i>HEXA</i>   | c.533G>A/<br>c.380T>G    | p=0.0628   | Tay-Sachs disease<br>#272800                                                                                                   | No                                   | Carriers<br><br>Autosomal<br>recessive                     |
| 64    | 15 y | M   | Bilateral ptosis<br>Dysmetria<br>Dysarthria<br>Horizontal nystagmus<br>Progressive cerebellar ataxia<br>Learning disability                                                                | <i>POLR3B</i> | c.1244T>C/<br>c.2740G>A  | p=0.0008   | Leukodystrophy,<br>hypomyelinating, 8,<br>with or without<br>oligodontia and/or<br>hypogonadotropic<br>hypogonadism<br>#614381 | No                                   | Carriers/Affected<br>brother<br><br>Autosomal<br>recessive |
| 65    | -    | F   | Increased neuronal autofluorescent<br>lipopigment<br>Ataxia<br>Seizures                                                                                                                    | <i>PPT1</i>   | c.541G>T/<br>c.541G>T    | p=0.0411   | Ceroid lipofuscinosis,<br>neuronal, 1<br>#256730                                                                               | No                                   | Carriers<br><br>Autosomal<br>recessive                     |
| 66    | 5 y  | M   | Arthralgia<br>Joint stiffness                                                                                                                                                              | <i>GNPTAB</i> | c.1325G>A/<br>c.1325G>A  | p=1.000    | Mucopolipidosis II<br>alpha/beta<br>#252500                                                                                    | No                                   | Carriers<br><br>Autosomal<br>recessive                     |

|    |     |   |                                                                                                                                                                                                |                |                                   |          |                                                                                                                 |     |                                 |
|----|-----|---|------------------------------------------------------------------------------------------------------------------------------------------------------------------------------------------------|----------------|-----------------------------------|----------|-----------------------------------------------------------------------------------------------------------------|-----|---------------------------------|
| 67 | 5 y | F | Progressive spasticity<br>Abnormality of peripheral nerve conduction<br>Developmental regression                                                                                               | <i>HSD17B4</i> | c.1273T>C/<br>c.1528G>A           | p=0.1340 | D-bifunctional protein deficiency<br>#261515                                                                    | No  | Carriers<br>Autosomal recessive |
| 68 | 6 y | F | Encephalopathy<br>CNS demyelination<br>Generalized hypotonia<br>Delayed speech and language development<br>Seizures<br>Global developmental delay                                              | <i>SLC17A5</i> | c.918T>G/<br>c.1239C>G            | p=0.0339 | Salla disease<br>#604369<br><br>Sialic acid storage disorder, infantile<br>#269920                              | No  | Carriers<br>Autosomal recessive |
| 69 | 8 m | M | Cerebral palsy<br>Bilateral sensorineural hearing impairment<br>Optic atrophy<br>Abnormal basal ganglia MRI signal intensity<br>Cerebellar atrophy<br>Peripheral axonal neuropathy<br>Seizures | <i>PLA2G6</i>  | c.1460_1462del/<br>c.1460_1462del | p=0.0205 | Neurodegeneration with brain iron accumulation 2B<br>#610217                                                    | No  | Carriers<br>Autosomal recessive |
| 70 | 3 y | M | Coarse facial features<br>Global developmental delay<br>Hyperactivity<br>Sensorial ataxia                                                                                                      | <i>NAGLU</i>   | c.531+5G>A/<br>c.1045_1047del     | p=0.3261 | Mucopolysaccharidosis type IIIB (Sanfilippo B)<br>#252920                                                       | No  | Carriers<br>Autosomal recessive |
| 71 | 7 y | M | Abnormality of cerebral white matter<br>Impaired smooth pursuit<br>Abnormal emotion/affect behavior<br>Vacuolated lymphocytes                                                                  | <i>POLR3A</i>  | c.2376_2377delAT/<br>c.2081G>A    | p=0.489  | Leukodystrophy, hypomyelinating, 7, with or without oligodontia and/or hypogonadotropic hypogonadism<br>#607694 | No  | Carriers<br>Autosomal recessive |
| 72 | 4 y | F | Hepatosplenomegaly<br>Abnormality of blood and blood-forming tissues<br>Hyposmia<br>Pain<br>Hypersplenism                                                                                      | <i>GBA</i>     | c.1226A>G/<br>c.930T>A            | p=0.0804 | Gaucher disease, type I<br>#230800                                                                              | Yes | Carriers<br>Autosomal recessive |
| 73 | 5 m | F | Seizures<br>Hypotonia                                                                                                                                                                          | <i>PEX12</i>   | c.888_889del/<br>c.888_889del     | p=0.0055 | Peroxisome biogenesis disorder 3                                                                                | No  | Carriers                        |

|    |     |   |                                                                                                                                                              |         |                           |          |                                                        |     |                                        |
|----|-----|---|--------------------------------------------------------------------------------------------------------------------------------------------------------------|---------|---------------------------|----------|--------------------------------------------------------|-----|----------------------------------------|
|    |     |   | Increased very long chain fatty acids                                                                                                                        |         |                           |          | #614859                                                |     | Autosomal recessive                    |
| 74 | 9 y | F | Motor deterioration<br>Fingerprint intracellular accumulation of autofluorescent lipopigment storage material                                                | CLN6    | c.829_836delinsCCT        | p=0.0028 | Ceroid lipofuscinosis, neuronal, 6 #601780             | No  | Carriers<br>Autosomal recessive        |
| 75 | 4 m | M | Hepatosplenomegaly<br>Muscular dystrophy<br>Generalized hypotonia                                                                                            | CTSA    | c.1252G>T/<br>c.1252G>T   | p=0.7652 | Galactosialidosis #256540                              | No  | Carriers<br>Autosomal recessive        |
| 76 | 4 y | F | Macroglossia<br>Relative macrocephaly<br>Abnormality of mucopolysaccharide metabolism<br>Hepatosplenomegaly<br>Hearing impairment<br>Corpus callosum atrophy | SGSH    | c.355+1G>A/<br>c.1080delC | p=0.4196 | Mucopolysaccharidosis type IIIA (Sanfilippo A) #252900 | No  | Carriers<br>Autosomal recessive        |
| 77 | 7 m | F | Hepatomegaly<br>Elevated hepatic transaminases<br>Epicanthus<br>Broad forehead<br>Increased urinary O-linked Sialopeptides                                   | GNE     | c.797G>A                  | p=0.529  | Sialuria #269921                                       | No  | Affected sisters<br>Autosomal dominant |
| 78 | -   | M | Delayed speech and language development<br>Hepatomegaly<br>Microcephaly<br>Umbilical hernia<br>Abnormality of joint mobility<br>Broad eyebrow                | SGSH    | c.1127T>C/<br>c.197C>G    | p=0.5943 | Mucopolysaccharidosis type IIIA (Sanfilippo A) #252900 | No  | Carriers<br>Autosomal recessive        |
| 79 | 1 y | M | Profound global developmental delay<br>Strabismus<br>Increased serum lactate<br>Abnormal CNS myelination<br>Increased CSF lactate                            | SLC16A2 | c.46delC                  | p=0.4992 | Allan-Herndon-Dudley syndrome #300523                  | No  | Mother<br>X-linked                     |
| 80 | 5 y | M | Hepatosplenomegaly<br>Thrombocytopenia                                                                                                                       | GBA     | c.1193G>A/<br>c.155C>T    | p=0.2962 | Gaucher disease, type I #230800                        | Yes | Carriers<br>Autosomal                  |

|    |      |   |                                                                                                                                                   |              |                          |          |                                                              |     |                                    |
|----|------|---|---------------------------------------------------------------------------------------------------------------------------------------------------|--------------|--------------------------|----------|--------------------------------------------------------------|-----|------------------------------------|
|    |      |   |                                                                                                                                                   |              |                          |          |                                                              |     | recessive                          |
| 81 | 10 y | F | Coarse facial features<br>Global developmental delay<br>Urinary glycosaminoglycan excretion<br>Hepatomegaly<br>Splenomegaly<br>Growth abnormality | <i>NAGLU</i> | c.1562C>T/<br>c.1693C>T  | p=0.0425 | Mucopolysaccharidosis<br>type IIIB (Sanfilippo B)<br>#252920 | No  | Carriers<br>Autosomal<br>recessive |
| 82 | 6 y  | M | Seizures<br>Developmental regression<br>Generalized hypotonia                                                                                     | <i>HEXA</i>  | c.533G>A                 | p=0.3875 | GM2-gangliosidosis<br>#272800                                | No  | Carriers<br>Autosomal<br>recessive |
| 83 | 5 y  | M | Muscular hypotonia<br>Cardiomyopathy<br>Elevated serum creatine phosphokinase                                                                     | <i>GAA</i>   | c.343C>T/<br>c.-32-13T>G | p=0.3778 | Glycogen storage<br>disease II<br>#232300                    | Yes | Carriers<br>Autosomal<br>recessive |

\* Changes in medication and/or diet after genetic diagnosis ;d:days; F: female; m: month; M: male; y:years

**Supplementary Table S5** - Clinical data and genetic findings for each patient with a negative result on the MITO panel and subsequent positive diagnosis with the NeuroSeq panel. Highlighting indicates genes associated with metabolic disorders (orange) and neurological disorders (blue).

| Cases | Age  | Sex | HPO                                                                                                                       | Gene           | Variants                    | Phenomizer | Disorder                                                  | MIM     | Parents/Inheritance                             | Allocated Panel         |
|-------|------|-----|---------------------------------------------------------------------------------------------------------------------------|----------------|-----------------------------|------------|-----------------------------------------------------------|---------|-------------------------------------------------|-------------------------|
| 84    | 2 y  | M   | Dilated cardiomyopathy<br>Blindness<br>Nystagmus                                                                          | <i>ALMS1</i>   | c.7586C>G/<br>c.11017C>T    | p=0.2338   | Alstrom syndrome                                          | #203800 | Carriers<br>Autosomal<br>recessive              | <b>HYPO/HYPER</b>       |
| 85    | 10 y | M   | Decreased activity of<br>mitochondrial complex I                                                                          | <i>SLC16A2</i> | c.99dupT                    | p=1.0000   | Allan-Herndon-Dudley<br>syndrome                          | #300523 | De novo<br>X-linked dominant                    | <b>COMP MOL</b>         |
| 86    | 5 m  | M   | Spastic tetraparesis<br>Polyneuropathy<br>Developmental regression<br>Generalized hypotonia<br>Global developmental delay | <i>POLR3A</i>  | c.2248-1G>C/<br>c.1771-7C>G | p=0.0266   | Wiedemann-<br>Rautenstrauch syndrome                      | #264090 | Carriers<br>Autosomal<br>recessive              | <b>COM MOL</b>          |
| 87    | 2 m  | M   | Increased serum lactate<br>Encephalopathy<br>Seizures                                                                     | <i>LIPT1</i>   | c.212C>T/<br>c.292C>T       | p=0.2631   | Lipoyltransferase 1<br>deficiency                         | #616299 | Carriers<br>Autosomal<br>recessive              | <b>MITO<br/>updated</b> |
| 88    | 2 y  | F   | Hypoglycemia<br>Lactic acidosis<br>Thin vermilion border<br>Abnormal facial shape<br>Widely spaced teeth                  | <i>LRPPRC</i>  | c.1678A>T/<br>c.1736-7T>G   | p=0.4006   | Mitochondrial complex<br>IV deficiency, nuclear<br>type 5 | #220111 | Carriers<br>Autosomal<br>recessive              | <b>MITO<br/>updated</b> |
| 89    | 7 y  | M   | Epilepsia partialis continua<br>Epileptic encephalopathy<br>Mitochondrial depletion                                       | <i>KCNT1</i>   | c.785G>A/<br>c.3503-1G>A    | p=0.0195   | Epilepsy, nocturnal<br>frontal lobe, 1                    | #615005 | Father/ <i>De novo</i><br>Autosomal<br>dominant | <b>EPILEPSY</b>         |
| 90    | 3 y  | F   | Encephalopathy<br>Dystonia<br>Decreased activity of<br>mitochondrial complex I<br>Ragged-red muscle fibers                | <i>GNAO1</i>   | c.607G>A                    | p=0.064    | Developmental and<br>epileptic encephalopathy<br>17       | #615473 | <i>De novo</i><br>Autosomal<br>dominant         | <b>EPILEPSY</b>         |
| 91    | 4 y  | M   | Generalized hypotonia<br>Muscular hypotonia<br>Epileptic encephalopathy                                                   | <i>KCNQ2</i>   | c.629G>A                    | p=0.0027   | Developmental and<br>epileptic encephalopathy<br>7        | #613720 | <i>De novo</i><br>Autosomal<br>dominant         | <b>EPILEPSY</b>         |

|                            |      |   |                                                                                                                                      |               |                             |          |                                                           |         |                                             |                                    |
|----------------------------|------|---|--------------------------------------------------------------------------------------------------------------------------------------|---------------|-----------------------------|----------|-----------------------------------------------------------|---------|---------------------------------------------|------------------------------------|
| Seizures                   |      |   |                                                                                                                                      |               |                             |          |                                                           |         |                                             |                                    |
| Global developmental delay |      |   |                                                                                                                                      |               |                             |          |                                                           |         |                                             |                                    |
| 92                         | 3 y  | F | Encephalopathy<br>Lactic acidosis<br>Developmental regression<br>Dystonia<br>Psychomotor deterioration<br>Abnormality of body weight | <i>GNAO1</i>  | c.709G>A                    | p=0.0383 | Developmental and<br>epileptic encephalopathy<br>17       | #615473 | <i>De novo</i><br><br>Autosomal<br>dominant | <b>EPILEPSY</b>                    |
| 93                         | 2 y  | F | Epileptic encephalopathy<br>Cortical atrophy<br>Progressive leukoencephalopathy                                                      | <i>KCNQ2</i>  | c.833T>C                    | p=0.0383 | Developmental and<br>epileptic encephalopathy<br>7        | #613720 | <i>De novo</i><br><br>Autosomal<br>dominant | <b>EPILEPSY</b>                    |
| 94                         | 4 m  | M | Hypotonia<br>Diffuse hypomyelination                                                                                                 | <i>SPTAN1</i> | c.6910_6918dup<br>CAGCTGGGC | -        | Developmental and<br>epileptic encephalopathy<br>5        | #613477 | <i>De novo</i><br><br>Autosomal<br>dominant | <b>EPILEPSY</b>                    |
| 95                         | 7 y  | M | Ophthalmoplegia                                                                                                                      | <i>SBF2</i>   | c.2380G>T/<br>c.2380G>T     | p=0.3379 | Charcot-Marie-Tooth<br>disease, Type 4b2                  | #604563 | Carriers<br><br>Autosomal<br>recessive      | <b>NEUROMUSCULAR<br/>DISORDER</b>  |
| 96                         | 18 y | M | Peripheral neuropathy<br>Ataxia<br>Pigmentary retinopathy                                                                            | <i>FLVCR1</i> | c.721G>A/<br>c.721G>A       | p=0.2157 | Ataxia, posterior<br>column, with retinitis<br>pigmentosa | #609033 | Carriers<br><br>Autosomal<br>recessive      | <b>MOVEMENT<br/>DISORDERS</b>      |
| 97                         | 5 y  | F | Abnormality of coordination<br>Delayed speech<br>Language development                                                                | <i>STAG1</i>  | c.2285T>A                   | -        | Mental retardation,<br>autosomal dominant 47              | #617635 | <i>De novo</i><br><br>Autosomal<br>dominant | <b>INTELLECTUAL<br/>DISABILITY</b> |

d:days; F: female; m: month; M: male; NA: not available; y:years

**Supplementary Table S6** - Clinical data and genetic findings for each patient for which an inconclusive diagnosis was obtained. Highlighting indicates clinical cases in which pathogenic variants (dark grey) and variants of uncertain significance (light grey) were detected.

| Cases          | Age  | Sex | HPO                                                                                                                                                                                                                                | Panel      | Gene          | Variants   | Disorder                                       | Inheritance | Family Study                        |
|----------------|------|-----|------------------------------------------------------------------------------------------------------------------------------------------------------------------------------------------------------------------------------------|------------|---------------|------------|------------------------------------------------|-------------|-------------------------------------|
| DOMINANT GENES |      |     |                                                                                                                                                                                                                                    |            |               |            |                                                |             |                                     |
| 98             | 9 y  | F   | Hypoglycemia<br>Focal seizures<br>Hyperinsulinism                                                                                                                                                                                  | HYPO/HYPER | <i>GLUD1</i>  | c.272C>T   | Hyperinsulinism-<br>hyperammonemia<br>syndrome | AD          | MOTHER<br>(maternal family history) |
| 99             | 5 y  | M   | Decreased activity of mitochondrial<br>complex IV<br>Seizures                                                                                                                                                                      | MITO       | <i>LETM1</i>  | c.709C>T   | Wolf-Hirschhorn<br>Syndrome                    | AD          | MOTHER<br>(maternal family history) |
| 100            | 3 y  | M   | Hyperinsulinemia<br>Hypoglycemia                                                                                                                                                                                                   | COM MOL    | <i>KCNJ11</i> | c.1105C>A  | Hyperinsulinemia<br>Hypoglycemia,<br>familial  | AD          | NA                                  |
| 101            | 18 y | F   | Hyperglycemia<br>Maturity-onset diabetes of the young                                                                                                                                                                              | HYPO/HYPER | <i>HNF1A</i>  | c.1295 C>T | MODY type II                                   | AD          | NA                                  |
| 102            | 4 y  | M   | Hyperalaninemia<br>Hyperglutaminemia<br>Increased serum lactate<br>Asymmetric septal hypertrophy<br>Hypertrophic cardiomyopathy<br>Strabismus<br>Encephalopathy<br>Global developmental delay<br>Increased CSF lactate<br>Seizures | NeuroSeq   | <i>WAC</i>    | c.1583C>T  | Desanto-Shinawi<br>syndrome                    | AD          | NA                                  |
| 103            | -    | F   | Macrocephaly<br>Hypoglycemia<br>Metabolic acidosis<br>Global developmental delay                                                                                                                                                   | INT MET    | <i>IDH2</i>   | c.419G>A   | D-2-hydroxyglutaric<br>aciduria 2              | AD          | NA                                  |

|                 |      |   |                                                                                                                                                                                                          |            |                |                          |                                                                                                                   |     |        |
|-----------------|------|---|----------------------------------------------------------------------------------------------------------------------------------------------------------------------------------------------------------|------------|----------------|--------------------------|-------------------------------------------------------------------------------------------------------------------|-----|--------|
| 104             | 5 y  | M | Mitochondrial depletion<br>Global developmental delay<br>Epilepsia partialis continua<br>Generalized hypotonia                                                                                           | NeuroSeq   | <i>ZEB2</i>    | c.3202_3207delGG<br>CTCG | Mowat-Wilson<br>syndrome<br>due to monosomy<br>2q22                                                               | AD  | NA     |
| 105             | 2 y  | M | Decreased mitochondrial complex I<br>and II activity                                                                                                                                                     | NeuroSeq   | <i>ARID1B</i>  | c.2281+1G>C              | Coffin-Siris<br>syndrome                                                                                          | AD  | NA     |
| 106             | -    | F | Dysmyelinating leukodystrophy<br>Global developmental delay                                                                                                                                              | COM MOL    | <i>SOX10</i>   | c.239T>C                 | Waardenburg<br>syndrome type 2                                                                                    | AD  | NA     |
| 107             | 10 y | M | Profound global developmental<br>delay<br>Gastroesophageal reflux<br>Ventriculomegaly<br>Agenesis of corpus callosum<br>Microcephaly<br>Upper airway obstruction<br>Dysphagia<br>Pontocerebellar atrophy | COM MOL    | <i>LMNB1</i>   | c.1025_1026delAA         | Leukodystrophy,<br>adult-onset,<br>autosomal dominant                                                             | AD  | NA     |
| 108             | 2 y  | M | Recurrent bacterial infections<br>Generalized hypotonia<br>Mild receptive language delay                                                                                                                 | NeuroSeq   | <i>ZNF41</i>   | c.2057T>C                | -                                                                                                                 | XL  | NA     |
| 109             | 5 y  | F | Ketotic hypoglycemia<br>Episodic ketoacidosis                                                                                                                                                            | HYPO/HYPER | <i>PHKA2</i>   | c.2911C>T                | Glycogen storage<br>disease, type IX                                                                              | XLD | NA     |
| 110             | 6 y  | F | Seizures<br>Global developmental delay                                                                                                                                                                   | NeuroSeq   | <i>PDHA1</i>   | c.577_578delTT           | Pyruvate<br>dehydrogenase<br>E1-alpha deficiency                                                                  | XL  | NA     |
| 111             | 5 y  | M | Decreased activity of mitochondrial<br>complex IV<br>Seizures                                                                                                                                            | MITO       | <i>NDUFB11</i> | c.152C>A                 | ?Mitochondrial<br>complex I deficiency,<br>nuclear type 30                                                        | XL  | MOTHER |
| RECESSIVE GENES |      |   |                                                                                                                                                                                                          |            |                |                          |                                                                                                                   |     |        |
| 112             | 3 y  | M | Epileptic encephalopathy<br>Abnormal CSF lactate level<br>Cerebral cortical atrophy<br>Leukoencephalopathy                                                                                               | MITO       | <i>POLRMT</i>  | c.3596T>C                | ? Autosomal<br>dominant<br>progressive external<br>ophthalmoplegia and<br>mitochondrial DNA<br>depletion syndrome | -   | TRANS  |



| 4A  |      |   |                                                                                                                                                  |            |                 |            |                                                                                                    |    |        |
|-----|------|---|--------------------------------------------------------------------------------------------------------------------------------------------------|------------|-----------------|------------|----------------------------------------------------------------------------------------------------|----|--------|
| 113 | 6 y  | M | NA                                                                                                                                               | HYPO/HYPER | <i>ETFDH</i>    | c.1274C>G  | Glutaric acidemia IIC                                                                              | AR | NA     |
| 114 | 2 y  | F | Celiac disease<br>Spastic diplegia<br>Spastic paraparesis<br>Leukoencephalopathy                                                                 | COM MOL    | <i>RNASEH2B</i> | c.655T>C   | Aicardi-Goutieres<br>Syndrome 2                                                                    | AR | NA     |
| 115 | 9 y  | M | Hyperornithinemia<br>Hydroxyprolinemia<br>Hydroxyprolinuria                                                                                      | INT MET    | <i>PRODH</i>    | c.1397C>T  | Hyperprolinemia,<br>type I                                                                         | AR | MOTHER |
| 116 | 9 y  | M | Fatigue<br>Recurrent infections<br>Spinal rigidity                                                                                               | MITO       | <i>DARS2</i>    | c.396+2T>G | Leukoencephalopath<br>y with brain stem<br>and spinal cord<br>involvement and<br>lactate elevation | AR | NA     |
| 117 | -    | F | Global developmental delay<br>Epileptic encephalopathy<br>Postnatal microcephaly                                                                 | COM MOL    | <i>PPT1</i>     | c.2T>C     | Ceroid lipofuscinosis,<br>neuronal, 2                                                              | AR | MOTHER |
| 118 | 9 y  | M | Dysphagia<br>Optic neuritis<br>Ptosis<br>Strabismus<br>Fatigable weakness<br>Hypertonia<br>Mitochondrial encephalopathy<br>Increased CSF lactate | MITO       | <i>BCS1L</i>    | c.166C>T   | Mitochondrial<br>complex III<br>deficiency,<br>nuclear type 1                                      | AR | FATHER |
| 119 | 3 m  | M | Orotic aciduria                                                                                                                                  | INT MET    | <i>UMPS</i>     | c.1213C>T  | Orotic aciduria                                                                                    | AR | NA     |
| 120 | 11 y | M | Lactic acidosis<br>Decreased activity of cytochrome C<br>oxidase in muscle tissue<br>Cerebral palsy                                              | MITO       | <i>PNPT1</i>    | c.493C>T   | Combined oxidative<br>phosphorylation<br>deficiency 13                                             | AR | MOTHER |
| 121 | 12 y | M | Decreased activity of mitochondrial<br>complex I                                                                                                 | MITO       | <i>ADCK4</i>    | c.103G>A   | Nephrotic syndrome,<br>type 9<br>(coenzyme Q10<br>deficiency)                                      | AR | MOTHER |
| 122 | 8 y  | F | Decreased activity of mitochondrial<br>complex II<br>Decreased activity of mitochondrial                                                         | MITO       | <i>NDUFAF2</i>  | c.490delG  | Mitochondrial<br>complex I deficiency,<br>nuclear type 10                                          | AR | MOTHER |

|     |      |   |                                                                                                                                                                                                                                          |            |               |           |                                                        |     |        |
|-----|------|---|------------------------------------------------------------------------------------------------------------------------------------------------------------------------------------------------------------------------------------------|------------|---------------|-----------|--------------------------------------------------------|-----|--------|
|     |      |   | complex IV<br>Cognitive impairment                                                                                                                                                                                                       |            |               |           |                                                        |     |        |
| 123 | -    | F | Seizures<br>Global developmental delay                                                                                                                                                                                                   | COM MOL    | <i>CLN6</i>   | c.314C>T  | Ceroid lipofuscinosis,<br>neuronal, 6                  | AR  | NA     |
| 124 | 5 y  | M | Focal autonomic seizures with<br>altered responsiveness<br>Mild microcephaly<br>Central apnea<br>Moderate postnatal growth<br>retardation<br>Generalized hypotonia<br>Hypertelorism<br>Wide nose<br>Anemia<br>Global developmental delay | NeuroSeq   | <i>MTO1</i>   | c.1390C>T | Combined oxidative<br>phosphorylation<br>deficiency 12 | AR  | NA     |
| 125 | 17 y | F | Ketotic hypoglycemia<br>Episodic ketoacidosis<br>Febrile seizures<br>Global developmental delay                                                                                                                                          | HYPO/HYPER | <i>PHKA2</i>  | c.2870A>G | Glycogen storage<br>disease, type IX                   | XLR | MOTHER |
| 126 | -    | M | Decreased activity of mitochondrial<br>complex I<br>Decreased activity of mitochondrial<br>complex II and III                                                                                                                            | MITO       | <i>SLC6A8</i> | c.928G>A  | Cerebral creatine<br>deficiency syndrome<br>1          | XLR | NA     |

#### DOMINANT AND RECESSIVE INHERITANCE

|     |     |   |                                                                                                                              |            |              |                                                                          |                                                                                          |        |                                     |
|-----|-----|---|------------------------------------------------------------------------------------------------------------------------------|------------|--------------|--------------------------------------------------------------------------|------------------------------------------------------------------------------------------|--------|-------------------------------------|
| 127 | 8 y | F | Decreased activity of mitochondrial<br>complex II<br>Decreased activity of mitochondrial<br>complex IV<br>Pyramidal syndrome | MITO       | <i>DNM1L</i> | c.1921G>A                                                                | Encephalopathy,<br>lethal, due to<br>defective<br>mitochondrial<br>peroxisomal fission 1 | AD, AR | NA                                  |
| 128 | 2 y | M | Noninsulin-dependent diabetes<br>mellitus                                                                                    | HYPO/HYPER | <i>PDX1</i>  | c.779G>A                                                                 | MODY, type IV                                                                            | AD, AR | FATHER<br>(paternal family history) |
| 129 | -   | M | Hyperinsulinemia<br>Hypoglycemia+<br>macrosomia                                                                              | HYPO/HYPER | <i>ABCC8</i> | g.(?_17464699)_(17<br>464884_?)del<br>g.(?_17464241)_(17<br>464454_?)del | Familial<br>hyperinsulinemic<br>hypoglycemia                                             | AD, AR | NA                                  |

|     |     |   |                                                 |      |             |           |                              |        |    |
|-----|-----|---|-------------------------------------------------|------|-------------|-----------|------------------------------|--------|----|
| 130 | 1 y | M | Abnormality of coordination<br>Gait disturbance | MITO | <i>SPG7</i> | c.1529C>T | Spastic Paraplegia<br>Type 7 | AD, AR | NA |
|-----|-----|---|-------------------------------------------------|------|-------------|-----------|------------------------------|--------|----|

POSSIBLE CASE OF DIGENIC INHERITANCE

|     |     |   |                                                    |            |                |                         |                                                  |        |                |
|-----|-----|---|----------------------------------------------------|------------|----------------|-------------------------|--------------------------------------------------|--------|----------------|
| 131 | 1 y | F | Ketotic hypoglycemia<br>Compensated hypothyroidism | HYPO/HYPER | <i>ABCC8</i>   | c.3004G>A               | Hypoglycemia of<br>infancy,<br>leucine-sensitive | AD, AR | <i>DE NOVO</i> |
|     |     |   |                                                    |            | <i>SLC37A4</i> | c.1225A>G/<br>c.1022C>T | Glycogen storage<br>disease                      | AR     | TRANS          |

*d:days; F: female; m: month; M: male; NA: not available; y:years*

**Supplementary Table S7** – Design of five different multi-gene panels consisting of a group of genes previously associated with: inborn errors of intermediary metabolism (INT MET), hypoglycemic/hyperglycemic events (HYPO/HYPER) associated with metabolic disorders or other processes, mitochondrial diseases (MITO), complex molecular defects including leukodystrophies (COMP MOL), and NeuroSeq panel which includes all the genes from the individual panels, along with genes associated with neurological disorders.

### INT MET panel

|          |       |          |        |          |        |        |         |         |         |         |         |        |         |         |          |         |         |
|----------|-------|----------|--------|----------|--------|--------|---------|---------|---------|---------|---------|--------|---------|---------|----------|---------|---------|
| ABCD4    | ACADM | ACADS    | ACADSB | ACADVL   | ACAT1  | ACAT2  | ACSF3   | ADA     | ADK     | ADSL    | AGL     | AGXT   | AGXT2   | AHCY    | ALDH4A1  | ALDH5A1 |         |
| ALDH6A1  |       | ALDOB    | AMT    | APRT     | ARG1   | ASL    | ASS1    | AUH     | BCKDHA  |         | BCKDHB  | BTD    | C2ORF25 | C7ORF10 | CBS      | CD320   | CLPB    |
| CLPX     | CPS1  | CPT1A    | CPT2   | CTH      | D2HGDH |        | DBT     | DHTKD1  | DLD     | DNAJC12 | DNAJC19 | DPYD   | DPYS    | ETFA    | ETFB     | ETFDH   | ETHE1   |
| FAH      | FBP1  | FH       | FMO3   | FTCD     | G6PC   | GALE   | GALK1   | GALT    | GBE1    | GCDH    | GCH1    | GCSH   | GGT1    | GLDC    | GLUL     | GLYCTK  | GNMT    |
| GPHN     | GRHPR | GSTZ1    | GYS2   | HADHA    | HADHB  | HAL    | HCFC1   | HGD     | HLC5    | HMGCL   | HMGCS2  | HOGA1  | HPD     | HPRT1   | HSD17B10 |         | HTRA2   |
| IDH2     | IVD   | L2HGDH   | LMBRD1 | MAT1A    | MCCC1  | MCCC2  | MCEE    | MDH1    | MLYCD   | MMAA    | MMAB    | MMACHC |         | MMADHC  |          | MOCOS   | MOC51   |
| MOC52    | MTHFR | MTR      | MTRR   | MUT      | NAGS   | NT5C3A | OAT     | OGDH    | OPA3    | OTC     | OXCT1   | PAH    | PC      | PCBD1   | PCCA     | PCCB    | PCK1    |
| PCK2     | PEPD  | PGM1     | PHKA2  | PHKB     | PHKG2  | PKLR   | PMM2    | PNP     | PRODH   | PRPS1   | PTS     | PYGL   | QDPR    | SERAC1  | SLC1A1   | SLC22A5 | SLC25A1 |
| SLC25A13 |       | SLC25A15 |        | SLC25A20 |        | SLC2A2 | SLC37A4 | SLC46A1 | SLC52A1 | SLC6A19 | SLC6A9  | SUCLA2 | SUCLG1  | SUOX    | TAT      | TAZ     | TCN2    |
| TIMM50   | UMPS  | UPB1     | XDH    |          |        |        |         |         |         |         |         |        |         |         |          |         |         |

### HYPO/HYPER panel

|       |       |       |        |         |         |        |        |         |        |        |        |       |      |      |       |       |          |      |
|-------|-------|-------|--------|---------|---------|--------|--------|---------|--------|--------|--------|-------|------|------|-------|-------|----------|------|
| ABCC8 | AKT2  | ALMS1 | APPL1  | ASXL2   | BLK     | BSCL2  | CAPN10 | CDKAL1  | CEL    |        | DIS3L2 | ENPP1 | GCCR | GCK  | GLIS3 | GLUD1 | GPD2     | HADH |
| HMGA1 | HNF1A | HNF1B | HNF4A  | IGF2BP2 | IL6     | INS    | INSR   | IRS1    | IRS2   | KCNJ11 | KLF11  | LEP   | LEPR | LIPC | LMNA  | MAFA  | MAPK8IP1 |      |
| MC4R  | MEN1  | MPI   | MTNR1B | NEUROD1 |         | NSD1   | PAX4   | PCSK1   | PDX1   | PGM1   | PLAGL1 | PLIN1 | PLUT | POMC | PPARA | PPARG | PPP1R3A  |      |
| PTPN1 | PYGL  | RETN  | SH2B1  | SIM1    | SLC16A1 | SLC2A1 | SLC2A2 | SLC30A8 | SLC5A1 | TCF2   | TCF7L2 | UBE3B | UCP2 | UMOD | WFS1  | ZFP57 |          |      |

### MITO panel

|          |        |        |        |       |         |        |          |         |         |        |         |        |         |         |         |         |          |
|----------|--------|--------|--------|-------|---------|--------|----------|---------|---------|--------|---------|--------|---------|---------|---------|---------|----------|
| AARS2    | ABCB11 | ACAD8  | ACAD9  | ACO2  | ADCK1   | ADCK2  | ADCK3    | ADCK4   | ADCK5   | ADSL   | AFG3L2  | AGK    | AIFM1   | AKR1B15 | APOPT1  | APTX    | ATAD1    |
| ATAD3A   | ATP5A1 | ATP5B  | ATP5C1 | ATP5D | ATP5E   | ATP5F1 | ATP5F1D  | ATP5G1  | ATP5G2  | ATP5G3 | ATP5O   | ATPAF1 | ATPAF2  | BCS1L   | BOLA3   | C10ORF2 | C12ORF65 |
| C19ORF12 |        | C1QBP  | CA5A   | CARS2 | CCDC88A |        | CEP89    | CHCHD10 |         | CLPB   | CLPP    | COA5   | COA6    | COA7    | COQ10A  | COQ10B  | COQ2     |
| COQ3     | COQ4   | COQ5   | COQ6   | COQ7  | COQ9    | COX10  | COX11    | COX14   | COX15   | COX16  | COX17   | COX18  | COX19   | COX4I1  | COX4I2  | COX6A1  | COX6A2   |
| COX6B1   | COX6B2 | COX7B  | COX8A  | CPS1  | CYC1    | CYCS   | DARS2    | DEAF1   | DGUOK   | DLAT   | DLD     | DNA2   | DNAJC19 | DNM1L   | E4F1    | EARS2   | ECHS1    |
| ELAC2    | ETHE1  | FAM36A | FARS2  | FARSB | FASTKD2 |        | FBXL4    | FDX1L   | FH      | FLAD1  | FOXRED1 |        | GARS    | GFER    | GFM1    | GFM2    | GLRX5    |
| GOT2     | GPT2   | GTPBP3 | GYG2   | HARS2 | HCCS    | HIBCH  | HSD17B10 |         | HSD17B4 | HSPD1  | HSPE1   | HTRA2  | IARS    | IARS2   | IBA57   | ISCA1   | ISCA2    |
| ISCU     | ITPA   | KARS   | LARS2  | LETM1 | LGI1    | LIAS   | LIPT1    | LIPT2   | LONP1   | LRP4   | LRPPRC  | LYRM4  | LYRM7   | MARS2   | MDH2    | MECP2   | MFF      |
| MFN1     | MFN2   | MGME1  | MICU1  | MIPEP | MNF1    | MPV17  | MRPL12   | MRPL3   | MRPL44  | MRPS16 | MRPS22  | MRPS23 | MRPS34  | MRPS7   | MTCH1   | MTERF1  | MTFMT    |
| MTHFD1L  |        | MTO1   | MTPAP  | NADK2 | NARS2   | NAT8L  | NAXE     | NDUFA1  | NDUFA10 |        | NDUFA11 |        | NDUFA12 |         | NDUFA13 |         | NDUFA2   |

|          |         |          |         |         |          |         |          |         |          |          |         |         |          |         |          |         |         |
|----------|---------|----------|---------|---------|----------|---------|----------|---------|----------|----------|---------|---------|----------|---------|----------|---------|---------|
| NDUFA3   | NDUFA4  | NDUFA4L2 |         | NDUFA5  | NDUFA9   | NDUFAF1 |          | NDUFAF2 |          | NDUFAF3  |         | NDUFAF4 |          | NDUFAF5 |          | NDUFAF6 |         |
| NDUFB1   | NDUFB10 |          | NDUFB11 |         | NDUFB2   | NDUFB3  | NDUFB4   | NDUFB5  | NDUFB6   | NDUFB7   | NDUFB8  | NDUFB9  | NDUFS1   | NDUFS2  | NDUFS3   | NDUFS4  | NDUFS5  |
| NDUFS6   | NDUFS7  | NDUFS8   | NDUFV1  | NDUFV2  | NDUFV3   | NFS1    | NFU1     | NUBPL   | OPA1     | OPA3     | PARS2   | PC      | PCK2     | PDHA1   | PDHA2    | PDHB    | PDHX    |
| PDK3     | PDP1    | PDP2     | PDSS1   | PDSS2   | PET100   | PET117  | PGAP2    | PIGN    | PMPCB    | PNPLA4   | PNPLA8  | PNPT1   | POLG     | POLG2   | POLRMT   | PTCD1   | PUS1    |
| QRSL1    | RANBP2  | RARS2    | RERE    | RMND1   | RNASEH1  |         | RPIA     | RRM2B   | RTN4IP1  | SARS     | SARS2   | SCO1    | SCO2     | SDHA    | SDHAF1   | SDHAF2  | SDHB    |
| SDHC     | SDHD    | SERAC1   | SFXN4   | SLC19A3 | SLC25A12 |         | SLC25A19 |         | SLC25A26 |          | SLC25A3 | SLC25A4 | SLC25A42 |         | SLC25A46 |         | SLC52A2 |
| SLC6A8   | SLC6A9  | SPG20    | SPG7    | SUCLA2  | SUCLG1   | SURF1   | TACO1    | TANGO2  | TARS2    | TAZ      | TAZ     | TBCD    | TBCE     | TFAM    | TIMM8A   | TK2     | TKT     |
| TMEM126A |         | TMEM126B |         | TMEM70  | TOP3A    | TPK1    | TRAK1    | TRIT1   | TRMT10C  |          | TRMT5   | TRMU    | TRNT1    | TSFM    | TTC19    | TUBB    | TUBB6   |
| TUFM     | TXN2    | TYMP     | UPB1    | UQCC3   | UQCR10   | UQCR11  | UQCRB    | UQCRC1  | UQCRC2   | UQCRCF51 |         | UQCRH   | UQCRHL   | UQCRQ   | VAC14    | VARS2   | VDAC1   |
| VDAC2    | WARS2   | YARS2    | YME1L1  |         |          |         |          |         |          |          |         |         |          |         |          |         |         |

## COMP MOL panel

|               |        |        |          |        |        |         |         |        |          |         |        |          |        |          |          |          |         |
|---------------|--------|--------|----------|--------|--------|---------|---------|--------|----------|---------|--------|----------|--------|----------|----------|----------|---------|
| AARS          | AARS2  | ABCD1  | ABCD3    | ABHD12 | ABHD5  | ACAA1   | ACER3   | ACOX1  | ADAR     | AGA     |        | AGPS     | AIFM1  | AIMP1    | AIMP2    | AKR1D1   | ALDH3A2 |
| AMACR         | APOPT1 | ARSA   | ARSB     | ASAH1  | ASPA   | ATP13A2 | ATRN    | BCAP31 | C11ORF73 |         |        | C19ORF12 |        | CLCN2    | CLN3     | CLN5     | CLN6    |
| CNTNAP1       |        | COL4A1 | CP       | CRAT   | CSF1R  | CTBP1   | CTC1    | CTSA   | CTSD     | CTSF    |        | CYP27A1  | CYP7B1 | DARS     | DHCR24   | DHCR7    | DNAJC5  |
| EBP           | EIF2B1 | EIF2B2 | EIF2B3   | EIF2B4 | EIF2B5 | EPRS    | ERAL1   | FA2H   | FAM126A  |         |        | FDFT1    | FUCA1  | GAA      | GALC     | GALNS    | GBA     |
| GFAP          | GJC2   | GLA    | GLB1     | GM2A   | GM1    | GNE     | GNPAT   | GNPTAB | GNPTG    | GNS     |        | GPHN     | GRN    | GUSB     | HEPACAM  |          | HEXA    |
| HGSNATHSD17B4 | HSD3B7 | HSPD1  |          | HTRA1  | HYAL1  | IBA57   | IDS     | IDUA   | IFIH1    | ITPA    |        | KCNT1    | KCTD7  | LAMP2    | LIPA     | LMNB1    | MAG     |
| MANBA         | MCOLN1 | MFSD8  | MLC1     | MSMO1  | MVK    | NAGA    | NAGLU   | NALCN  | NANS     | NDUFA2  | NEU1   | NKX6-2   | NOTCH3 | NPC1     | NPC2     | NPL      | NSDHL   |
| NUBPL         | PEX1   | PEX10  | PEX11B   | PEX12  | PEX13  | PEX14   | PEX16   | PEX19  | PEX2     | PEX26   | PEX3   | PEX5     | PEX6   | PEX7     | PHYH     | PLEKHG2  |         |
| PLP1          | PMM2   | POLR1A | POLR1C   | POLR3A | POLR3B | PPT1    | PSAP    | PYCR2  | RAB33B   | RARS    | REPS1  | RNASEH2A |        | RNASEH2B |          | RNASEH2C |         |
| RNASET2       |        | SAMHD1 | SC5D     | SCARB2 | SCP2   | SGSH    | SIGMAR1 |        | SLC16A2  | SLC17A5 | SLC1A4 | SLC25A12 |        | SMPD1    | SNORD118 |          | SOX10   |
| SPTAN1        | SUMF1  | TBCD   | TMEM106B |        | TPP1   | TREX1   | TUBB4A  | UBTF   | UFM1     | VPS11   | VPS33A |          |        |          |          |          |         |

## NeuroSeq panel

|         |         |         |        |        |        |         |       |        |          |         |         |          |          |        |          |          |         |
|---------|---------|---------|--------|--------|--------|---------|-------|--------|----------|---------|---------|----------|----------|--------|----------|----------|---------|
| AARS    | AARS2   | AASS    | ABAT   | ABCB11 | ABCB7  | ABCC8   | ABCD1 | ABCD3  | ABCD4    | ABHD12  | ABHD5   | ACAA1    | ACAD8    | ACAD9  | ACADM    | ACADS    | ACADSB  |
| ACADVL  | LACAT1  | ACAT2   | ACBD5  | ACER3  | ACHE   | ACMSD   | ACO2  | ACOX1  | ACSF3    | ACSL4   | ACTA1   | ACTB     | ACTG1    | ADA    | ADAM22   | ADAMTS2  |         |
| ADAR    | ADAT3   | ADCK1   | ADCK2  | ADCK3  | ADCK4  | ADCK5   | ADCY5 | ADCY6  | ADD3     | ADGRG1  | ADGRG6  | ADGRV1   | ADK      | ADNP   | ADPRHL2  |          | ADSL    |
| ADSSL1  | AEBP1   | AFF2    | AFG3L2 | AGA    | AGK    | AGL     | AGMO  | AGO1   | AGPS     | AGRN    | AGXT    | AGXT2    | AHCY     | AHDC1  | AHI1     | AIFM1    | AIMP1   |
| AIMP2   | AKR1B15 |         | AKR1D1 | AKT1   | AKT2   | AKT3    | ALAD  | ALAS2  | ALDH18A1 |         | ALDH3A2 |          | ALDH4A1  |        | ALDH5A1  |          | ALDH6A1 |
| ALDH7A1 |         | ALDOA   | ALDOB  | ALG1   | ALG11  | ALG12   | ALG13 | ALG14  | ALG2     | ALG3    | ALG6    | ALG8     | ALG9     | ALMS1  | ALPK3    | ALS2     | ALX4    |
| AMACR   | AMPD1   | AMPD2   | AMT    | ANK3   | ANKLE2 | ANKRD11 |       | ANO10  | ANO3     | ANO5    | AP1S2   | AP3B2    | AP4B1    | AP4E1  | AP4M1    | AP4S1    | AP5Z1   |
| APBB1   | APOA1BP | APOL2   | APOL4  | APOPT1 | APPL1  | APRT    | APTX  | ARCNI  | ARF1     | ARFGEF2 |         | ARG1     | ARHGEF10 |        | ARHGEF15 |          | ARHGEF2 |
| ARHGEF6 |         | ARHGEF9 |        | ARID1A | ARID1B | ARL13B  | ARL3  | ARL6   | ARL6IP1  | ARMC4   | ARMC9   | ARSA     | ARSB     | ARSI   | ARV1     | ARX      | ASAH1   |
| ASCC1   | ASH1L   | ASL     | ASNS   | ASPA   | ASPM   | ASS1    | ATAD1 | ATAD3A | ATAD3B   | ATAD3C  | ATCAY   | ATG5     | ATL1     | ATL3   | ATM      | ATP13A2  | ATP1A2  |
| ATP1A3  | ATP1B1  | ATP2A1  | ATP2B3 | ATP5A1 | ATP5B  | ATP5C1  | ATP5D | ATP5E  | ATP5F1   | ATP5F1D | ATP5G1  | ATP5G2   | ATP5G3   | ATP5O  | ATP6AP2  | ATP6V0A2 |         |
| ATP6V1A |         | ATP7A   | ATP7B  | ATP8A2 | ATPAF1 | ATPAF2  | ATR   | ATRN   | ATRX     | AUH     | AUTS2   | B3GALNT2 |          | B3GNT1 | B4GALNT1 |          | B4GALT1 |

|             |         |         |         |          |         |          |         |          |          |         |          |          |          |          |          |         |           |     |
|-------------|---------|---------|---------|----------|---------|----------|---------|----------|----------|---------|----------|----------|----------|----------|----------|---------|-----------|-----|
| B4GALT7B9D1 | B9D2    | BAG3    | BBIP1   | BBS1     | BBS10   | BBS12    | BBS2    | BBS4     | BBS5     | BBS7    | BBS9     | BCAP31   | BCKDHA   | BCKDHB   | BCKDK    |         |           |     |
| BCL11A      | BCL11B  | BCS1L   | BEAN1   | BICD2    | BIN1    | BLK      | BMP1    | BOLA3    | BPTF     | BRAF    | BRAT1    | BRF1     | BRPF1    | BRWD3    | BSCL2    | BTD     | BVES      |     |
| C6ORF66     |         | C10ORF2 |         | C11ORF73 |         | C12ORF65 |         | C19ORF12 |          | C2ORF86 | C5ORF42  | C7ORF10  | C8ORF37  | CA5A     | CA8      | CACNA1A |           |     |
| CACNA1B     |         | CACNA1C |         | CACNA1D  |         | CACNA1G  |         | CACNA1H  |          | CACNA1S |          | CACNA2D1 | CACNA2D2 |          |          | CACNB4  | CACNG2    |     |
| CAD         | CAMK2A  |         | CAMK2B  |          | CAMTA1  |          | CAPN1   | CAPN3    | CARS2    | CASC5   | CASK     | CASQ1    | CASR     | CAV3     | CBL      | CBS     | CC2D1A    |     |
| CC2D2A      | CCDC115 | CCDC174 | CCDC28B |          | CCDC78  | CCDC88A  |         | CCDC88C  |          | CCM1    | CCND2    | CCT5     | CD320    | CDH15    | CDK13    | CDK5    | CDK5RAP2  |     |
| CDK6        | CDKL5   | CDON    | CEL     | CENPE    | CENPF   | CENPJ    | CEP104  | CEP120   | CEP135   | CEP152  | CEP164   | CEP290   | CEP41    | CEP63    | CEP89    | CERS1   | CFL2      |     |
| CHAMP1      | CHAT    | CHCHD10 |         | CHD1     | CHD2    | CHD7     | CHD8    | CHI3L1   | CHKB     | CHMP1A  | CHMP1B   | CHRNA1   | CHRNA2   | CHRNA4   | CHRNB1   | CHRN2   | CHRNA2    |     |
| CHRNE       | CHRNA1  | CHRNA2  | CHRNA4  | CHRN1    | CHRN2   | CHRNA2   | CHRNA4  | CHRN1    | CHRN2    | CHRNA2  | CHRNA4   | CHRN1    | CHRN2    | CHRNA2   | CHRNA4   | CHRN1   | CHRN2     |     |
| CLPP        | CLPX    | CLTC    | CNKSR2  | CNNM2    | CNOT3   | CNPY3    | CNTN1   | CNTN2    | CNTNAP1  |         | CNTNAP2  |          | COA5     | COA6     | COA7     | COASY   | COG1      |     |
| COG2        | COG4    | COG5    | COG6    | COG7     | COG8    | COL12A1  | COL13A1 | COL18A1  | COL1A1   | COL1A2  | COL3A1   | COL4A1   | COL4A2   | COL4A3BP |          | COL5A1  | COL5A2    |     |
| COL5A3      | COL6A1  | COL6A2  | COL6A3  | COL6A6   | COLEC11 |          | COLQ    | COMT     | COQ10A   | COQ10B  | COQ2     | COQ3     | COQ4     | COQ5     | COQ6     | COQ7    | COQ9      |     |
| COX10       | COX11   | COX14   | COX15   | COX16    | COX17   | COX18    | COX19   | COX4I1   | COX4I2   | COX6A1  | COX6A2   | COX6B1   | COX6B2   | COX7B    | COX8A    | CP      | CPA6      |     |
| CPLX1       | CPOX    | CPS1    | CPT1A   | CPT1C    | CPT2    | CRADD    | CRAT    | CRBN     | CRTAP    | CRYAB   | CSDE1    | CSF1R    | CSNK1G1  |          | CSNK2B   | CSPP1   | CSTB      |     |
| CTBP1       | CTC1    | CTCF    | CTH     | CTNNA2   | CTNNB1  | CTSA     | CTSD    | CTSF     | CTTNBP2  |         | CTU2     | CUL4B    | CUX2     | CWF19L1  | CXORF56  | CYC1    | CYCS      |     |
| CYFIP2      | CYP26B1 | CYP27A1 | CYP2U1  | CYP7B1   |         | D2HGDH   |         | DAB1     | DAG1     | DAO     | DAOA     | DARS     | DARS2    | DBT      | DCAF17   | DCAF8   | DCC       |     |
| DCHS1       | DCX     | DDC     | DDHD1   | DDHD2    | DDOST   | DDX3X    | DEAF1   | DENND5A  |          | DEPDC5  | DES      | DGAT2    | DGUOK    | DHCR24   | DHCR7    | DHDDS   | DHFR      |     |
| DHTKD1      | DHX30   | DIAPH1  | DISC1   | DISP1    | DLAT    | DLD      | DLG3    | DLGAP4   | DLL1     | DMD     | DNA2     | DNAJB2   | DNAJB6   | DNAJC12  | DNAJC19  | DNAJC3  | DNAJC5    |     |
| DNM1        | DNM1L   | DNM2    | DNMT1   | DNMT3A   |         | DOCK3    | DOCK7   | DOCK8    | DOK7     | DOLK    | DPAGT1   | DPM1     | DPM2     | DPM3     | DPP6     | DPYD    | DPYS      |     |
| DRD3        | DRD4    | DRD5    | DRP2    | DSCAM    | DST     | DSTYK    | DYM     | DYNC1H1  |          | DYRK1A  | DYSF     | E4F1     | EARS2    | EBF3     | EBP      | ECEL1   | ECHS1     |     |
| EDC3        | EEF1A2  | EEF2    | EFHC1   | EFNB1    | EFTUD2  | EGR2     | EIF2AK2 | EIF2B1   | EIF2B2   | EIF2B3  | EIF2B4   | EIF2B5   | EIF2S3   | EIF4E    | ELAC2    | ELOVL4  | ELOVL5    |     |
| ELP2        | EMD     | EMILIN1 | EML1    | EMX2     | ENTPD1  | EOMES    | EPB41L1 | EPM2A    | EPRS     | EPT1    | ERAL1    | ERBB3    | ERBB4    | ERF      | ERGIC1   | ERLIN1  | ERLIN2    |     |
| ERMARD      |         | ETFA    | ETFB    | ETFDH    | ETHE1   |          | EVL     | EXOSC3   | EXOSC9   | EXT2    | EZH2     | FA2H     | FAH      | FAM111B  | FAM126A  |         | FAM36A    |     |
| FARS2       | FARSB   | FAS     | FASTKD2 |          | FAT2    | FAT4     | FBN1    | FBN2     | FBP1     | FBXL4   | FBXO11   | FBXO31   | FDFT1    | FDX1L    | FECH     | FGD1    | FGD4      |     |
| FGF12       | FGF14   | FGF8    | FGFR1   | FGFR2    | FGFR3   | FH       | FHL1    | FIG4     | FKBP10   | FKBP14  | FKRP     | FKTN     | FLAD1    | FLNA     | FLNC     | FLVCR1  | FMN2      |     |
| FMO3        | FMR1    | FOLR1   | FOXA2   | FOXG1    | FOXH1   | FOXP1    | FOXP2   | FOXRED1  |          | FREM1   | FRMD4A   | FRMPD4   | FRRS1L   | FTCD     | FTL      | FTSJ1   | FUCA1     | FUS |
| FUT8        | G6PC    | GAA     | GABBR2  | GABRA1   | GABRA5  | GABRB1   | GABRB2  | GABRB3   | GABRD    | GABRG2  | GAD1     | GALC     | GALE     | GALK1    | GALNS    | GALT    | GAN       |     |
| GARS        | GAS1    | GATAD2B |         | GBA      | GBA2    | GBE1     | GCDH    | GCH1     | GCK      | GCSH    | GDAP1    | GDI1     | GEMIN4   | GFAP     | GFER     | GFM1    | GFM2      |     |
| GFPT1       | GGT1    | GJB1    | GJC2    | GLA      | GLB1    | GLDC     | GLDN    | GLE1     | GLI2     | GLI3    | GLIS2    | GLIS3    | GLRA1    | GLRB     | GLRX5    | GLUD1   | GLUL      |     |
| GLYCTK      | GM2A    | GMPPA   | GMPPB   | GNAL     | GNAO1   | GNAQ     | GNB1    | GNB4     | GNB5     | GNE     | GNMT     | GNPAT    | GNPTAB   | GNPTG    | GNS      | GOLGA2  | GOSR2     |     |
| GOT2        | GPAA1   | GPC3    | GPHN    | GPR88    | GPRASP1 |          | GPSM2   | GPT2     | GRB14    | GRHRP   | GRIA3    | GRIA4    | GRID2    | GRIK2    | GRIN1    | GRIN2A  | GRIN2B    |     |
| GRIN2D      | GRM1    | GRM5    | GRN     | GSTZ1    | GTPBP3  | GUF1     | GUSB    | GYG1     | GYG2     | GYS1    | GYS2     | GZF1     | HACD1    | HACE1    | HADH     | HADHA   | HADHB     |     |
| HAL         | HARS    | HARS2   | HBA1    | HCCS     | HCFC1   | HCN1     | HCN2    | HCN4     | HDAC8    | HECW2   | HEPACAM  |          | HERC2    | HESX1    | HEXA     | HEXB    | HFE       |     |
| HGD         | HGSNATH | HIBCH   | HINT1   | HINT3    | HIVEP2  | HK1      | HLCS    | HMB5     | HMGCL    | HMGCS2  | HNF1A    | HNF4A    | HNF6     | HNMT     | HNRNPA1  |         | HNRNPA2B1 |     |
| HNRNPDL     |         | HNRNPH1 |         | HNRNPH2  |         | HNRNPU   |         | HOGA1    | HOXA1    | HPCA    | HPD      | HPRT1    | HRAS     | HSD17B10 |          | HSD17B4 | HSD3B7    |     |
| HSPB1       | HSPB3   | HSPB8   | HSPD1   | HSP1     | HSPG2   |          | HTRA2   | HUWE1    |          | HYAL1   | HYOU1    | IARS     | IARS2    | IBA57    | ICK      | IDH2    | IDS       |     |
| IDUA        | IER3IP1 | IFIH1   | IFITM5  | IFT122   | IFT27   | IFT64    | IGBP1   | IGHMBP2  |          | IKBKAP  | IL11RA   | IL1RAPL1 |          | IMPA1    | INAVA    | INF2    | INPP5E    |     |
| INPP5K      | INS     | INSR    | INVS    | IQCB1    | IQSEC1  | IQSEC2   | IRF2BPL | ISCA1    | ISCA2    | ISCU    | ISPD     | ITGA5    | ITGA7    | ITPA     | ITPR1    | IVD     | JPH1      |     |
| KANK1       | KARS    | KAT6A   | KATNB1  | KBTBD13  | KCNA1   | KCNA2    | KCNB1   | KCNC1    | KCNC3    | KCND3   | KCNH1    | KCNH5    | KCNJ10   | KCNJ11   | KCNMA1   |         | KCNQ2     |     |
| KCNQ3       | KCNQ5   | KCNT1   | KCNT2   | KCTD17   | KCTD7   | KDM5B    | KDM5C   | KDM6A    | KIAA0196 |         | KIAA0226 |          | KIAA0556 |          | KIAA0586 |         | KIAA1109  |     |

|              |          |           |          |          |         |          |         |          |          |          |         |          |          |             |          |         |          |
|--------------|----------|-----------|----------|----------|---------|----------|---------|----------|----------|----------|---------|----------|----------|-------------|----------|---------|----------|
| KIAA1279     | KIAA2022 | KIDINS220 | KIF11    | KIF14    | KIF1A   | KIF1B    | KIF1C   | KIF22    | KIF2A    | KIF4A    | KIF5A   | KIF5C    | KIF7     | KIRREL3     |          |         |          |
| KLC2         | KLF11    | KLHL15    | KLHL40   | KLHL41   | KMT2B   | KMT5B    | KPTN    | KRAS     | KY       | L1CAM    | L2HGDHL | LAMA2    | LAMB1    | LAMB2       | LAMC3    | LAMP2   | LARGE    |
| LARS2        | LAS1L    | LDB3      | LDHA     | LEPRE1   | LETM1   | LGT1     | LGI4    | LIAS     | LIMS2    | LINGO1   | LINS    | LIPA     | LIPT1    | LIPT2       | LITAF    | LMAN2L  | LMBRD1   |
| LMNA         | LMNB1    | LMNB2     | LMOD3    | LNPK     | LONP1   | LRP2     | LRP4    | LRPPRC   | LRRC56   | LRSAM1   | LTC4S   | LYRM4    | LYRM7    | LZTFL1      | LZTR1    | MAFA    | MAG      |
| MAGEL2       | MAGI2    | MAN1B1    | MAN2B1   | MANBA    | MAOA    |          | MAP2    | MAPK10   | MAPT     | MARS     | MARS2   | MASP1    | MAT1A    | MAT2A       | MATR3    | MBD5    | MBOAT7   |
| MCCC1        | MCCC2    | MCEE      | MCM3AP   |          | MCOLN1  | MCPH1    | MDH1    | MDH2     | MECP2    | MECR     | MED12   | MED13L   | MED17    | MED20       | MED23    | MED25   | MEF2C    |
| MEGF10       | MEIS2    | METTL23   | MFF      | MFN1     | MFN2    | MFSD2A   | MFSD8   | MGAT2    | MGME1    | MICU1    | MID2    | MIPEP    | MIR17HG  |             | MKKS     | MKS1    | MLC1     |
| MLYCD        | MMAA     | MMAB      | MMACHC   |          | MMADHC  |          | MME     | MNF1     | MOCOS    | MOCOS1   | MOCOS2  | MOGS     | MORC2    | MPDU1       | MPDZ     | MPI     | MPV17    |
| MPZ          | MR1      | MRE11A    | MRPL12   | MRPL3    | MRPL44  | MRPS16   | MRPS22  | MRPS23   | MRPS34   | MRPS7    | MRT04   | MSMO1    | MSTO1    | MSX2        | MTCH1    | MTERF   | MTFMT    |
| MTHFD1L      |          | MTHFR     | MTM1     | MTMR14   | MTMR2   | MTO1     | MTOR    | MTPAP    | MTR      | MTRR     | MUSK    | MUT      | MVK      | MYBPC1      | MYCN     | MYF6    | MYH14    |
| MYH2         | MYH3     | MYH7      | MYH8     | MYO18B   | MYO9A   | MYOT     | MYPN    | MYT1L    | NAA15    | NACC1    | NADK2   | NAGA     | NAGLU    | NAGS        | NALCN    | NANS    | NAPB     |
| NARS2        | NAT8L    | NCAPD2    | NCAPD3   | NCAPH    | NCKAP1  | NDE1     | NDP     | NDRG1    | NDST1    | NDUFA1   | NDUFA10 |          | NDUFA11  |             | NDUFA12  |         | NDUFA13  |
| NDUFA2       | NDUFA3   | NDUFA4    | NDUFA4L2 |          | NDUFA5  | NDUFA6   | NDUFA9  | NDUFAF1  |          | NDUFAF2  |         | NDUFAF3  |          | NDUFAF4     |          | NDUFAF5 |          |
| NDUFAF6      |          | NDUFB1    | NDUFB10  |          | NDUFB11 |          | NDUFB2  | NDUFB3   | NDUFB4   | NDUFB5   | NDUFB6  | NDUFB7   | NDUFB8   | NDUFB9      | NDUFS1   | NDUFS2  | NDUFS3   |
| NDUFS4       | NDUFS5   | NDUFS6    | NDUFS7   | NDUFS8   | NDUFV1  | NDUFV2   | NDUFV3  | NEB      | NECAP1   | NEDD4L   | NEFH    | NEFL     | NEK1     | NEK8        | NEK9     | NEU1    | NEUROD1  |
| NFIA         | NFS1     | NFU1      | NGLY1    | NGN3     | NHEJ1   | NHLRC1   | NIN     | NIPA1    | NIPA2    | NKX6-2   | NLGN4X  | NONO     | NOTCH3   | NPC1        | NPC2     | NPHP1   | NPHP3    |
| NPHP4        | NPL      | NPRL2     | NPRL3    | NRAS     | NRXN1   | NSDHL    | NSUN2   | NT5C2    | NT5C3A   | NTNG1    | NTRK2   | NUAK1    | NUBPL    | NUP37       | NUS1     | OAT     | OCLN     |
| OFD1         | OGDH     | OGT       | OPA1     | OPA3     | OPHN1   | ORAI1    | OTC     | OTUD6B   | OTX2     | OXCT1    | P4HB    | PABPN1   | PACS1    | PACS2       | PAFAH1B1 |         | PAH      |
| PAK1         | PAK3     | PANK2     | PARK2    | PARK7    | PARS2   | PAX3     | PAX4    | PAX5     | PBX1     | PC       | PCBD1   | PCCA     | PCCB     | PCDH12      | PCDH19   | PCDH7   | PCK1     |
| PCK2         | PCNA     | PDE10A    | PDE6D    | PDGFB    | PDHA1   | PDHA2    | PDHB    | PDHX     | PDK3     | PDP1     | PDP2    | PDSS1    | PDSS2    | PDX1        | PDYN     | PEPD    | PET100   |
| PET117       | PEX1     | PEX10     | PEX11B   | PEX12    | PEX13   | PEX14    | PEX16   | PEX19    | PEX2     | PEX26    | PEX3    | PEX5     | PEX6     | PEX7        | PFKFB2   | PFKM    | PGAM2    |
| PGAP1        | PGAP2    | PGK1      | PGM1     | PHC1     | PHF6    | PHF8     | PHIP    | PHKA1    | PHKA2    | PHKB     | PHKG2   | PHYH     | PIBF1    | PIEZO2      | PIGA     | PIGC    | PIGG     |
| PIGH         | PIGN     | PIGO      | PIGQ     | PIGS     | PIK3CA  | PIK3R2   | PIK3R5  | PINK1    | PIP5K1C  | PKLR     | PLA2G6  | PLAA     | PLCB1    | PLD3        | PLEC     | PLEKHG2 |          |
| PLEKHG5      |          | PLOD1     | PLOD2    | PLOD3    | PLP1    | PMM2     | PMP22   | PMPCA    | PMPCB    | PNKP     | PNP     | PNPLA2   | PNPLA4   | PNPLA6      | PNPLA8   | PNPO    | PNPT1    |
| POGLUT1      |          | POGZ      | POLG     | POLG2    | POLR1A  | POLR1C   | POLR2M  | POLR3A   | POLR3B   | POLRMT   | POMGNT1 |          | POMGNT2  |             | POMK     | POMT1   | POMT2    |
| PPIB         | PPM1D    | PPOX      | PPP1CB   | PPP1R15B |         | PPP2R1A  | PPP2R5D | PPP3CA   | PPT1     | PQBP1    | PRDM8   | PRICKLE1 |          | PRICKLE2    |          | PRKAG2  | PRKCG    |
| PRKRA        | PRNP     | PRODH     | PROSC    | PRPF39   | PRPS1   | PRRT2    | PRSS12  | PRUNE1   | PRX      | PSAP     | PSMD12  | PTCD1    | PTCH1    | PTCHD1      | PTEN     | PTPN11  | PTS      |
| PUM1         | PURA     | PUS1      | PUS3     | PYCR2    | PYGL    | PYGM     | PYROXD1 |          | QARS     | QDPR     | QRSL1   | RAB11A   | RAB11B   | RAB18       | RAB23    | RAB33B  | RAB39B   |
| RAB3GAP1     |          | RAB3GAP2  |          | RAB40AL  |         | RAB7A    | RAC1    | RAF1     | RALGAPA1 |          | RANBP2  | RAPSN    | RARS     | RARS2       | RBBP8    | RBCK1   | RBFOX1   |
| RBFOX3       | RBM12    | RBMX      | RECQL4   | REEP1    | REEP2   | RELN     | REPS1   | RERE     | RFT1     | RHOBTB2  |         | RIT1     | RLIM     | RMND1       | RNASEH1  |         | RNASEH2A |
| RNASEH2B     |          | RNASEH2C  |          | RNASET2  |         | RNF170   | RNF216  | ROBO1    | ROGDI    | RORA     | RORB    | RP2      | RPGRIP1L |             | RPIA     | RPL10   | RPS23    |
| RPS6KA3RRM2B | RTN2     | RTN4IP1   | RTN4R    | RTTN     |         | RYR1     | RYR3    | SACS     | SAMD9L   | SAMHD1   | SARS    | SARS2    | SASS6    | SBF1        | SBF2     | SC5D    | SCA2     |
| SCAPER       | SCARB2   | SCN10A    | SCN1A    | SCN1B    | SCN2A   | SCN3A    | SCN4A   | SCN7A    | SCN8A    | SCN9A    | SCO1    | SCO2     | SCP2     | SCYL1       | SDCCAG8  |         | SDHA     |
| SDHAF1       | SDHAF2   | SDHB      | SDHC     | SDHD     | SELENON |          | SEMA3E  | SEPSECS  | SERAC1   | SERPINF1 |         | SERPINH1 |          | SERPINI1SET |          | SETBP1  | SETD2    |
| SETD5        | SETDB2   | SETX      | SFXN4    | SGCA     | SGCB    | SGCD     | SGCE    | SGSH     | SH3TC2   | SHANK2   | SHANK3  | SHH      |          | SHOC2       | SHROOM4  |         | SIGMAR1  |
| SIK1         | SIL1     | SIN3A     | SIX3     |          | SKI     | SLC12A5  | SLC12A6 | SLC13A5  | SLC16A1  | SLC16A2  | SLC17A5 | SLC18A2  | SLC18A3  | SLC19A3     | SLC1A1   | SLC1A2  | SLC1A3   |
| SLC22A5      | SLC25A1  | SLC25A12  |          | SLC25A13 |         | SLC25A15 |         | SLC25A19 |          | SLC25A20 |         | SLC25A22 |          | SLC25A26    |          | SLC25A3 | SLC25A32 |
| SLC25A4      | SLC25A42 |           | SLC25A46 |          | SLC2A1  | SLC2A10  | SLC2A2  | SLC30A10 |          | SLC30A9  | SLC33A1 | SLC35A1  | SLC35A2  | SLC35A3     | SLC35C1  | SLC37A4 | SLC39A13 |
| SLC39A14     |          | SLC39A8   | SLC3A1   | SLC45A1  | SLC46A1 | SLC52A1  | SLC52A2 | SLC52A3  | SLC5A1   | SLC5A7   | SLC6A1  | SLC6A17  | SLC6A19  | SLC6A3      | SLC6A5   | SLC6A8  | SLC6A9   |
| SLC9A1       | SLC9A6   | SLC9A9    | SMARCA1  |          | SMARCA4 |          | SMARCB1 |          | SMARCC2  |          | SMC1A   | SMCHD1   | SMPD1    | SMS         | SNAP25   | SNAP29  | SNORD118 |

[illegible]
